# Supplementary material
Source: publisher site journal article supplement (https://www.dovepress.com/article/215835)
Supplement: Supplementary file 1 [file get_supplementary_file.php]

**Supplements: Figure and Table legends**

**Fig. S1.** 3-D cube plot of Box-Behnken experimental design for 3 factors.

**Table S1.** Scoring of human skin irritation study

**Table S2.** Criteria of single dose skin irritation study score system

**Table S3.** Effect of poloxamer on the average particle size of solid lipid nanoparticles.

**Supplementary Information:**


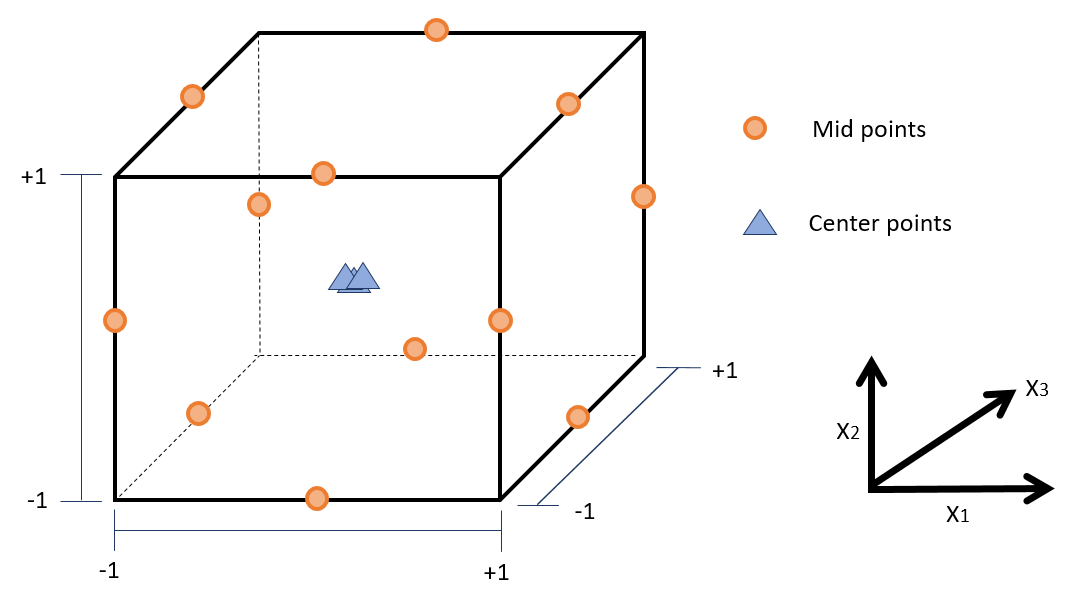


**Fig. S1**. 3-D cube plot of Box-Behnken experimental design for 3 factors.

**Table S1.** Scoring of human skin irritation study

| **Criteria** | **Score** |
| --- | --- |
| No signs of inflammation, normal skin | 0 (-) |
| Doubtful or slight reaction | 0.5 (±) |
| Slight erythema | 1 (+) |
| Moderate erythema with or without partial edema or papules | 2 (++) |
| Moderate erythema with diffuse edema | 3 (+++) |
| Intense erythema with diffuse edema with vesicles | 4 (+++) |

**Table S2**. Criteria of single dose skin irritation study score system

| **Criteria** | **Irritation score** |
| --- | --- |
| No irritancy | 0-0.02 |
| Low irritancy | 0.021-0.25 |
| Slight irritancy | 0.26-1 |
| Moderate irritancy | 1-2.5 |
| Severe irritancy | 2.5- |

**Table S3.** Effect of poloxamer on the average particle size of solid lipid nanoparticles.

|  | Formulation | | |
| --- | --- | --- | --- |
|  | Rx 1 | Rx 2 | Rx 3 |
| PPD (%, w/v) | 0.05 | 0.05 | 0.05 |
| Cetyl palmitate (%, w/v) | 1 | 1 | 1 |
| Tween 20 (%, v/v) | 1 | 1 | 1 |
| Poloxamer (%, w/v) | 0 | 0.25 | 0.5 |
| Particle size (nm) | 261 ± 2.44 | 223 ± 7.53 | 207 ± 6.23 |

**Abbreviations:** PPD, 20(S)-protopanaxadiol; Rx, NLC formulation
